# Supplementary material for: Enhanced desalination performance in flow electrode capacitive deionization with nitrogen doped porous carbon
Source: Royal Society of Chemistry journal article supplement (doi:10.1039/d3nj00491k), 2023-01-01
Supplement: d3nj00491k1.pdf [file d3nj00491k1.pdf]

## Supporting information

for

### Enhanced desalination performance in flow electrode capacitive deionization with nitrogen doped porous carbon

Bo Xie <sup>a</sup>, Qilin Liu <sup>a</sup>, Chunqiong Hu <sup>a</sup>, Hongmei Li <sup>b</sup>, Guangqun Tan <sup>a\*</sup>, Dan Xiao <sup>a\*</sup>

<sup>a</sup> College of Chemical Engineering, Sichuan University, Chengdu 610065, PR China

<sup>b</sup> College of Chemistry, Sichuan University, Chengdu 610065, PR China

**\*Corresponding author**

E-mail: [tanguangqun@scu.edu.cn](mailto:tanguangqun@scu.edu.cn) (Guangqun Tan), [xiaodan@scu.edu.cn](mailto:xiaodan@scu.edu.cn) (D. Xiao)

**Table. S1.** Parameters index of activated carbon.

| Item                             | YEC-8A |
|----------------------------------|--------|
| Surface area (m <sup>2</sup> /g) | >1800  |
| Ash (%)                          | 0.26   |
| Moisture                         | <5     |
| Iron salt (%)                    | <0.005 |
| Particle size                    | ~10 μm |

**Table. S2.** Parameters index of ion exchange membrane

| Membrane type                                                | anion exchange membrane | cation exchange membrane |
|--------------------------------------------------------------|-------------------------|--------------------------|
|                                                              | Grion 0011 (28S)        | Grion 1201 (3)           |
| thickness<br>(hygrometric state )<br>(mm)                    | 0.28 ± 0.03             | 0.26 ± 0.02              |
| Dry and wet<br>dilatancy (%)                                 | 5~12                    | 4~6                      |
| Water content (%)                                            | 35 ( wet )              | 35 ( wet )               |
| Bursting strength<br>(Kg/cm <sup>2</sup> )                   | 6                       | 9                        |
| Exchange capacity<br>(meq/g)                                 | 2.1                     | 1.9                      |
| Selective transmittance<br>(%)                               | 98                      | ≥98                      |
| The membrane<br>surface resistance<br>(Ω · cm <sup>2</sup> ) | 3                       | 2.4                      |
| Current density<br>(mA · cm <sup>2</sup> )                   | < 150                   | < 100                    |
| Temperature<br>resistance (°C)                               | < 80°C                  | < 60°C                   |

**Table. S3.** Composition of the flow electrode.

| Sample    | Active material (g) | Deionized water (mL) | Carbon black (g) |
|-----------|---------------------|----------------------|------------------|
| 1 wt% AC  | 0.8 AC              | 79.0                 | 0.2              |
| 2 wt% AC  | 1.6 AC              | 78.2                 | 0.2              |
| 3 wt% AC  | 2.4 AC              | 77.4                 | 0.2              |
| 1 wt% NPC | 0.8 NPC             | 79.0                 | 0.2              |
| 2 wt% NPC | 1.6 NPC             | 78.2                 | 0.2              |
| 3 wt% NPC | 2.4 NPC             | 77.4                 | 0.2              |

**Table. S4.** Porosity parameters and heteroatom content of the NPC

| Sample  | $S_{\text{BET}}$ ( $\text{m}^2 \cdot \text{g}^{-1}$ ) | Carbon content<br>(at%) | Nitrogen content<br>(at%) | Oxygen content<br>(at%) |
|---------|-------------------------------------------------------|-------------------------|---------------------------|-------------------------|
| AC      | 2,143.8                                               | 92.48                   | 1.02                      | 6.50                    |
| NPC-700 | 787.4                                                 | 86.34                   | 8.64                      | 5.02                    |
| NPC-800 | 1168.4                                                | 93.77                   | 3.12                      | 3.11                    |
| NPC-900 | 1079.1                                                | 94.89                   | 2.54                      | 2.57                    |

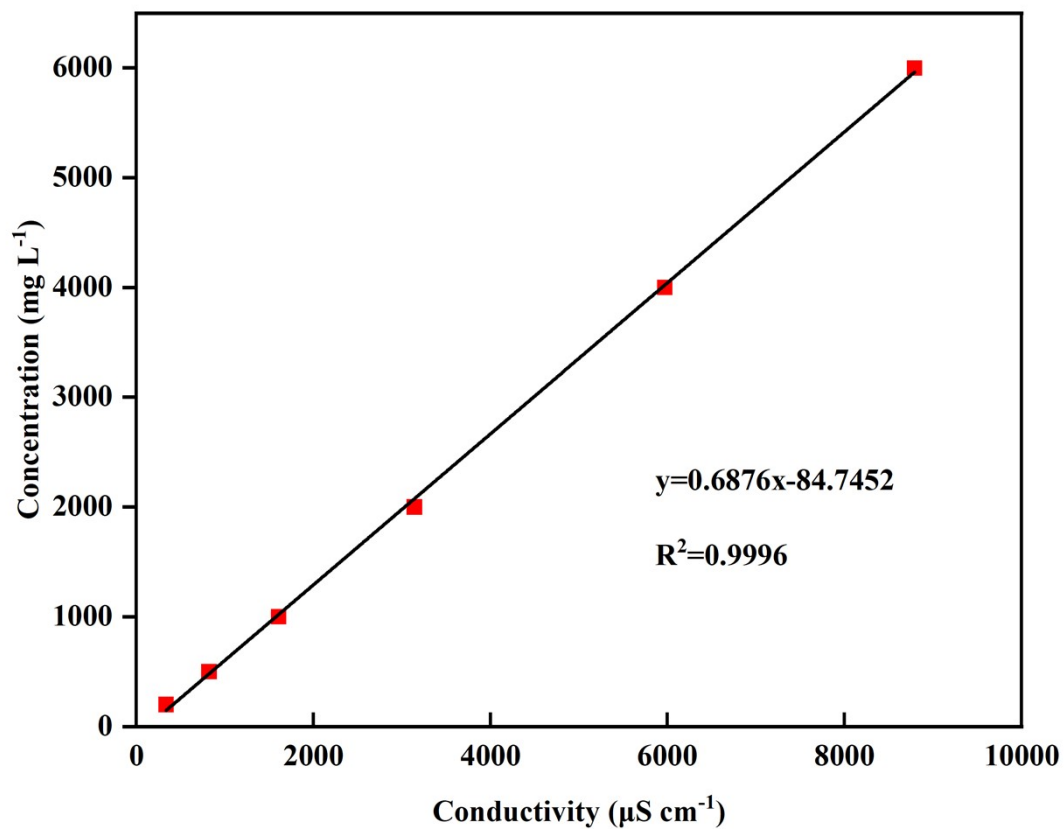

Fig. S1. Calibration curve of conductivity to NaCl concentration.

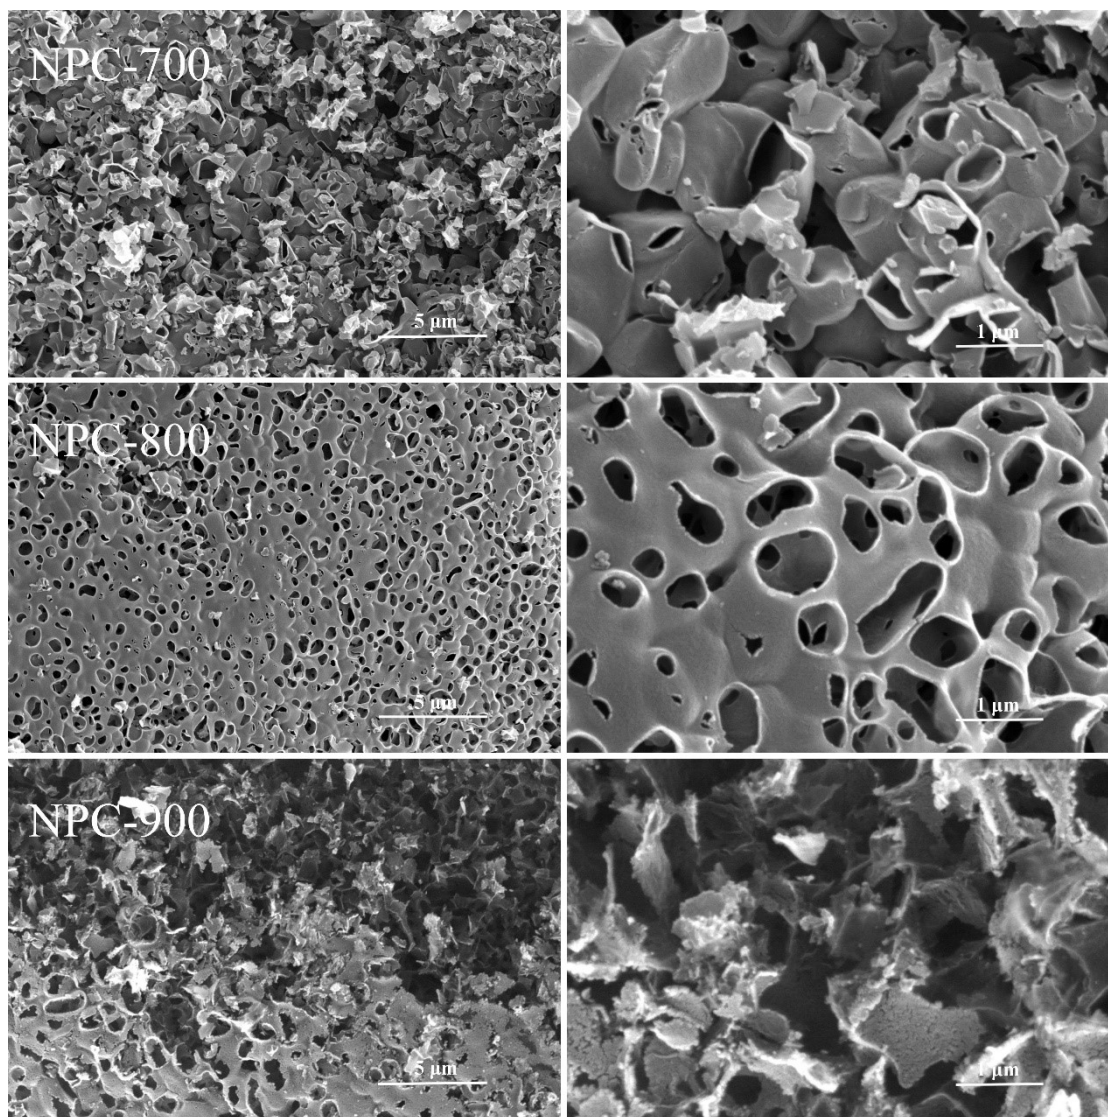

**Fig. S2.** Morphology of NPC prepared at different pyrolysis temperatures illustrated by SEM.

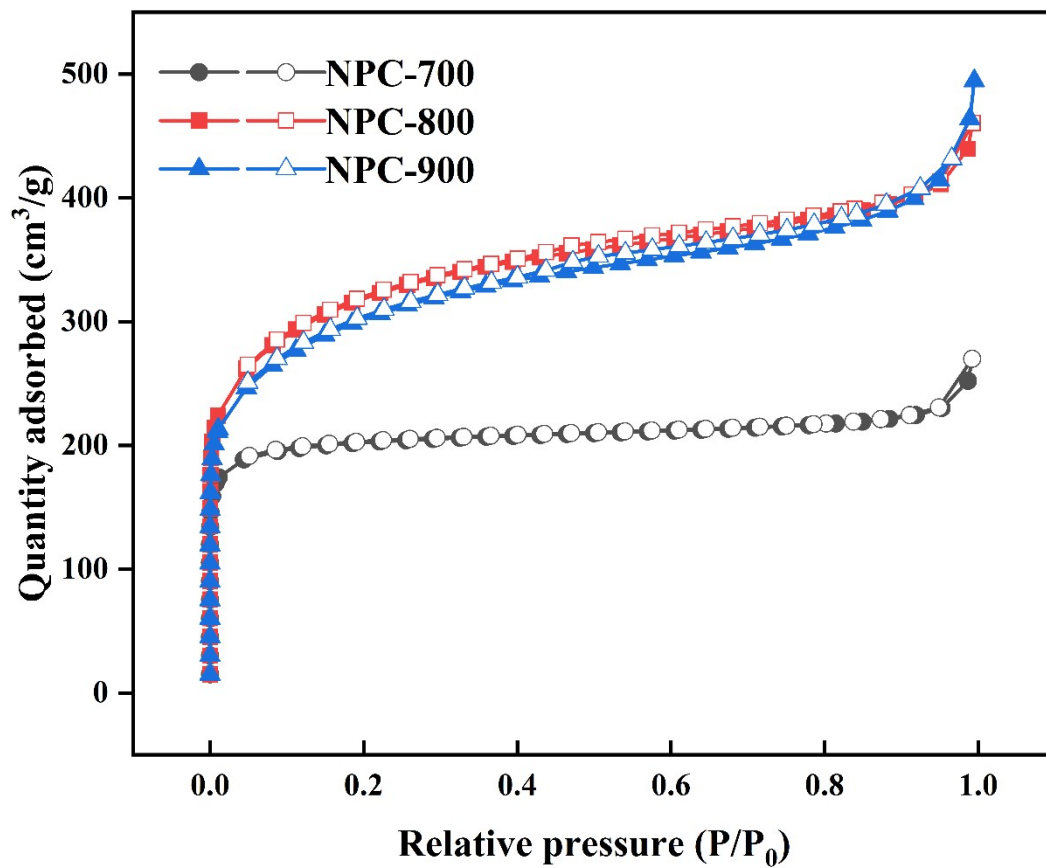

Fig. S3. Nitrogen adsorption/desorption isotherms of NPC prepared from different pyrolysis temperature.



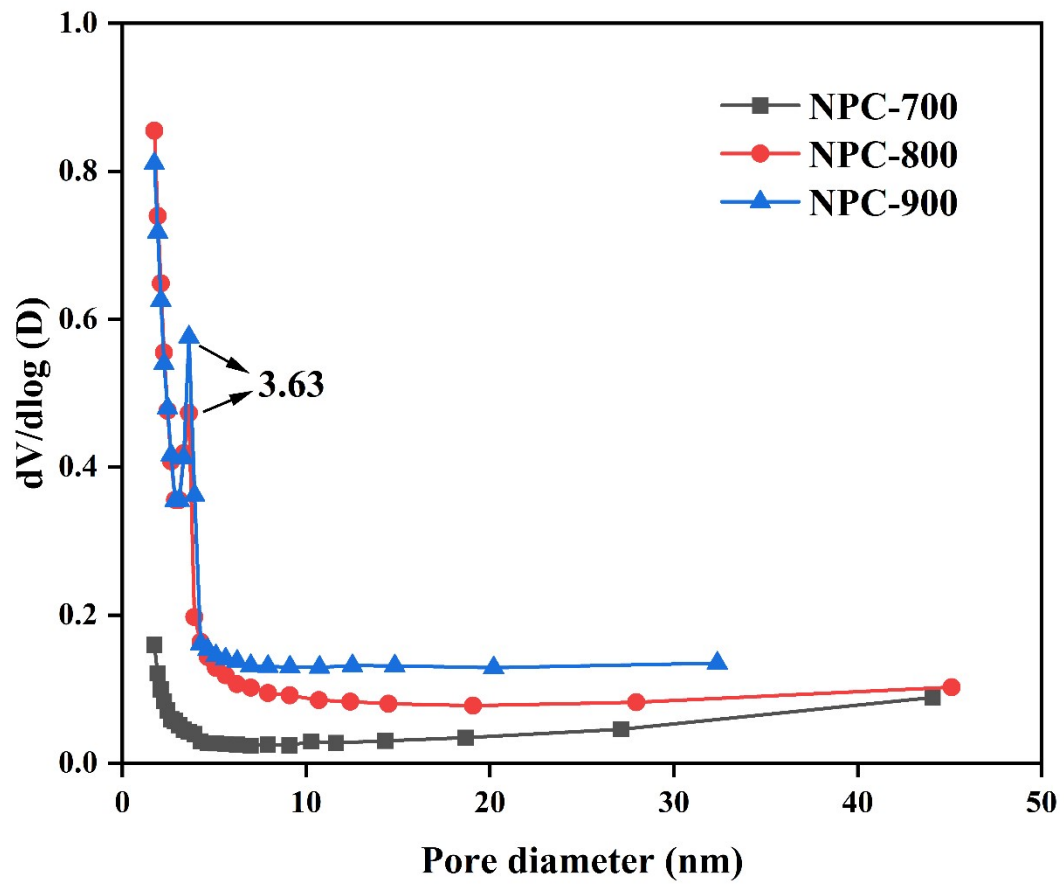

Fig. S4. BJH pore size distribution plots for the NPC prepared from different pyrolysis temperature.

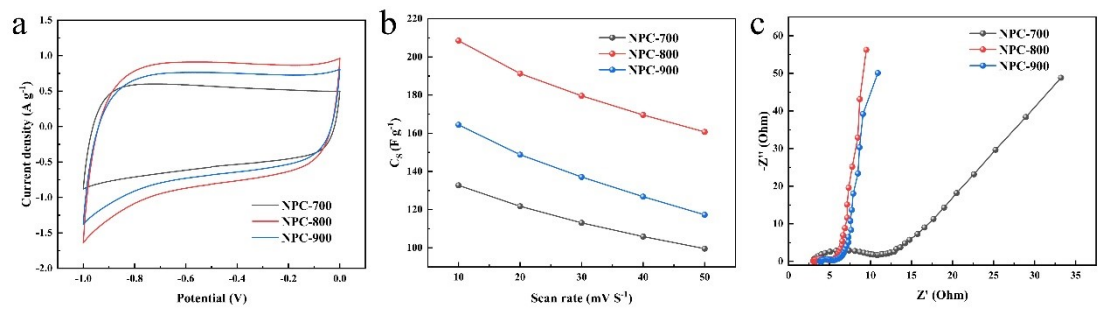

**Fig. S5.** Electrochemical performance tests of the NPC electrodes at different pyrolysis temperature in a 1M NaCl aqueous solution. (a) The CV curves were scanned at a rate of  $10 \text{ mV s}^{-1}$ ; (b) The specific capacitance at different scan rates; (c) EIS spectra of the NPC.

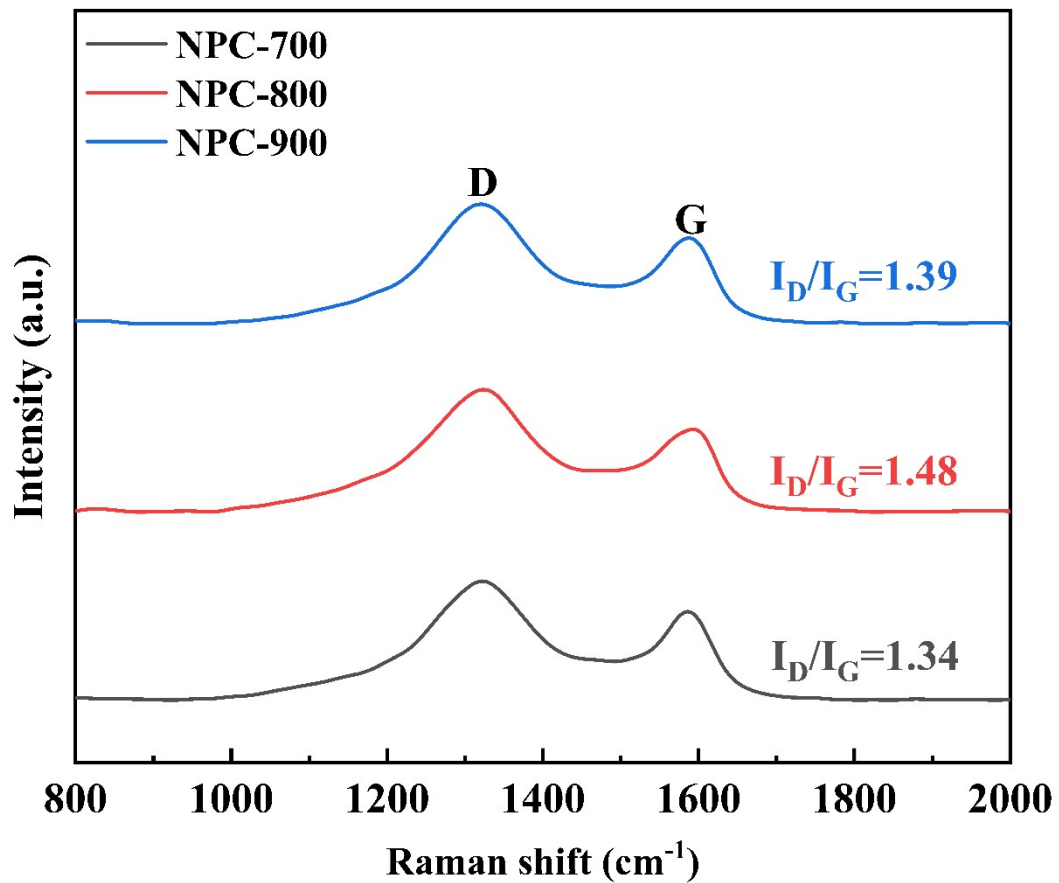

Fig. S6. The Raman spectroscopy of NPC at different pyrolysis temperature

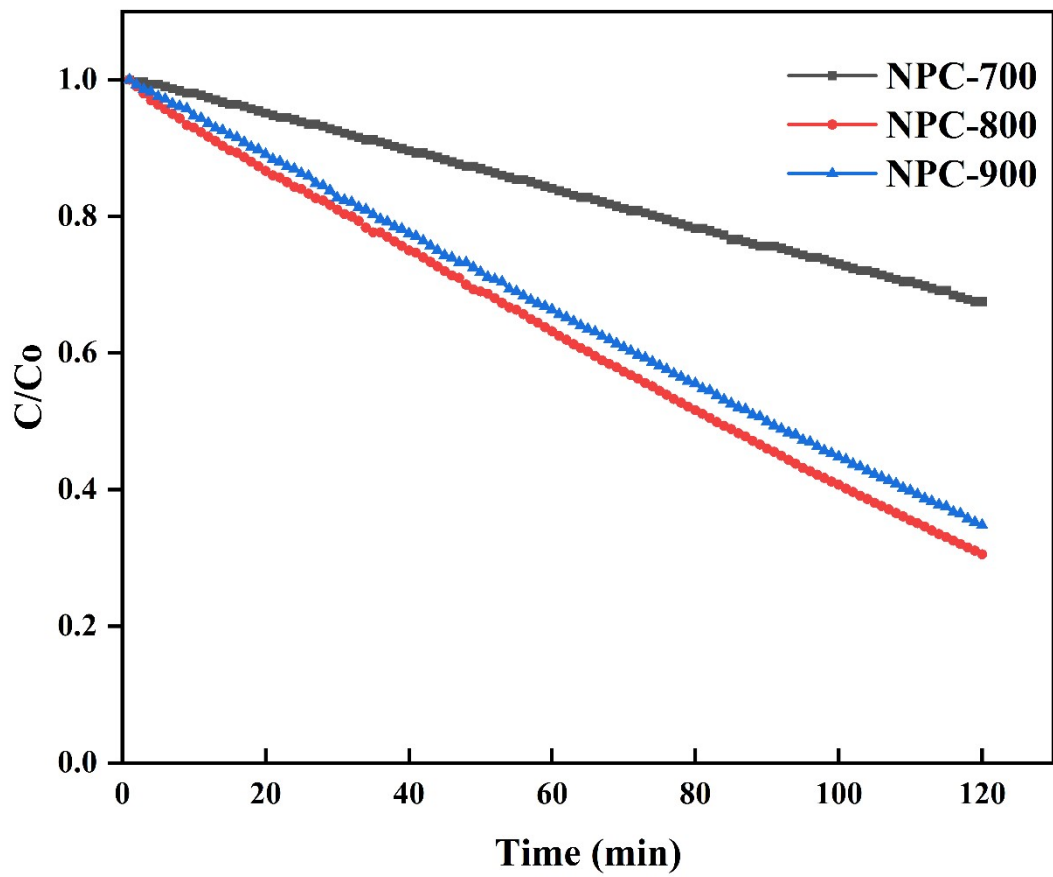

**Fig. S7.** The  $C/C_0$  of three NPC prepared at different pyrolysis temperature (1.2 V applied voltage, 1 wt% carbon content, 2000 mg L<sup>-1</sup> initial concentration of NaCl).

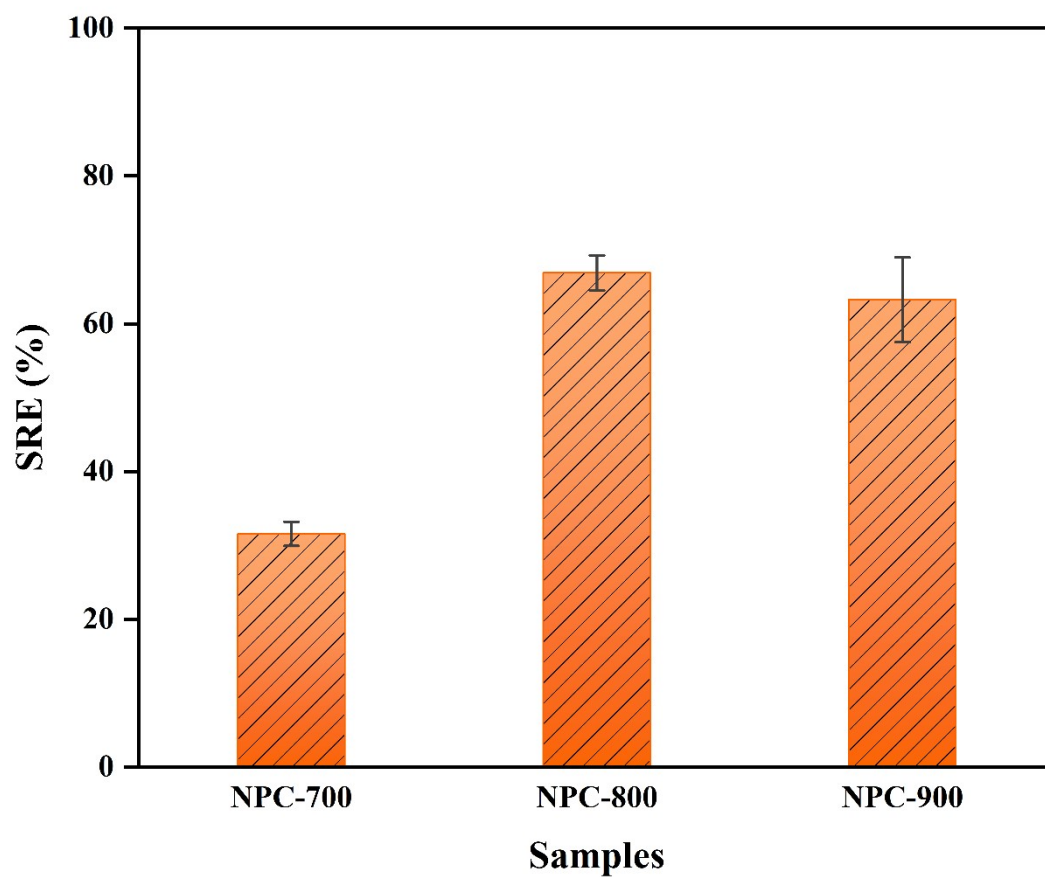

**Fig. S8.** The SRE of the three NPC samples. (1.2 V applied voltage, 1 wt% carbon content, 2000 mg L<sup>-1</sup> initial concentration of NaCl).

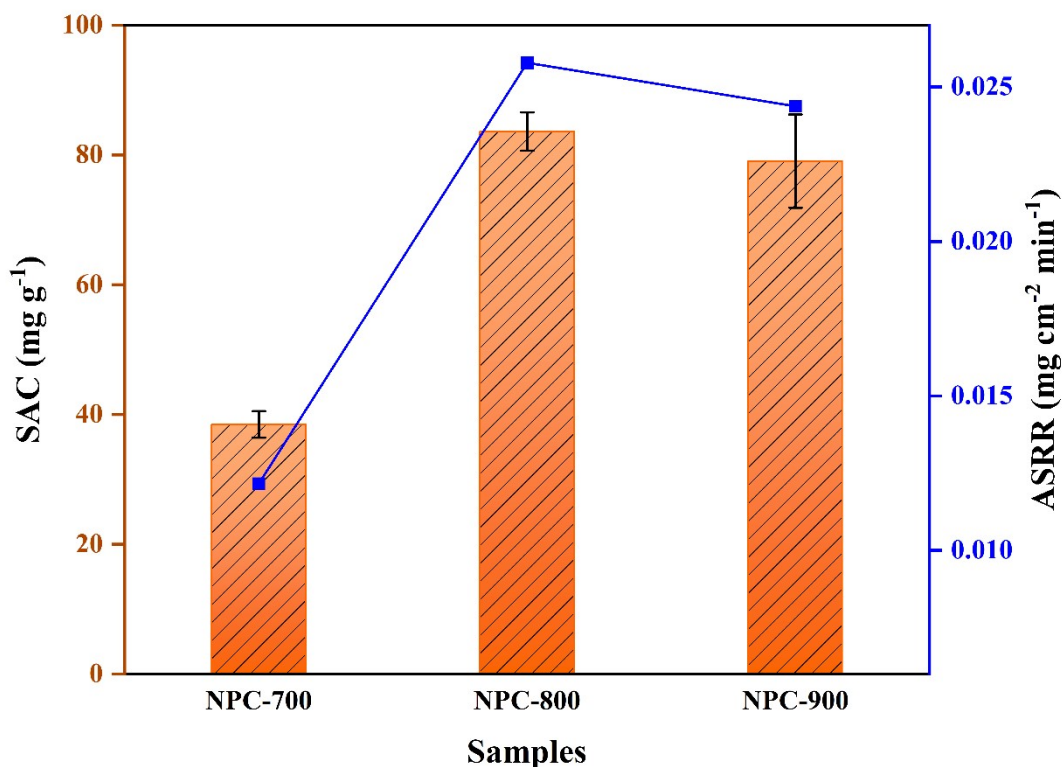

**Fig. S9.** The SAC and ASRR of the three NPC samples. (1.2 V applied voltage, 1 wt% carbon content, 2000 mg L<sup>-1</sup> initial concentration of NaCl).

The Desalination performances of the three samples prepared at different temperatures were studied. As shown in Fig. S7, the NPC-800 showed lowest  $C/C_0$  than the other samples, the salt adsorption capacity (SAC), average salt removal rate (ASRR) and the salt removal efficiency (SRE) for NPC-800 were higher than that of NPC-700 and NPC-900 (Fig. S8, Fig. S9). The reason for this was that the NPC-800 had a higher specific surface area and pore volume, suitable nitrogen and oxygen doping, it presented the best desalination performance among the three NPC samples. As for NPC-700, it did not form a mesoporous structure (Fig. S4) and had a small specific surface area at lower temperatures. As for NPC-900, when the temperature was too high, the pore structure was destroyed and the surface collapsed (Fig. S2), resulting in a reduction of the specific surface area.

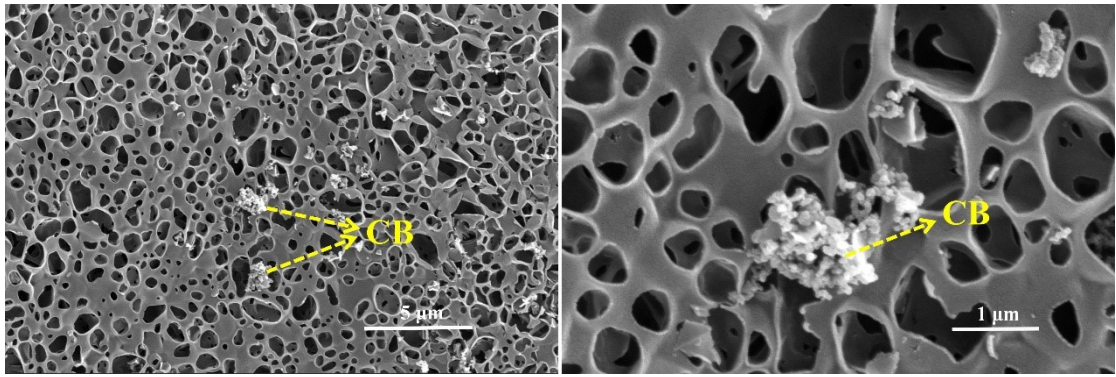

**Fig. S10.** The SEM of NPC with CB after desalination experimen
